# Supplementary material for: Cancer tolerance to chromosomal instability is driven by Stat1 inactivation in vivo
Source: bioRxiv or medRxiv preprint supplement (doi:10.1101/2021.12.03.471107), 2021-12-06
Supplement: Supplementary file [file media-5.pdf]

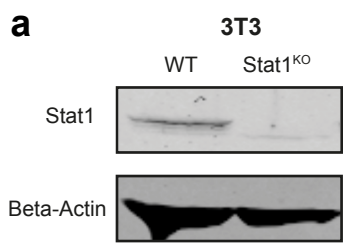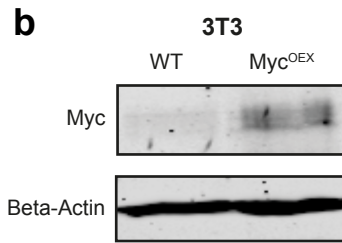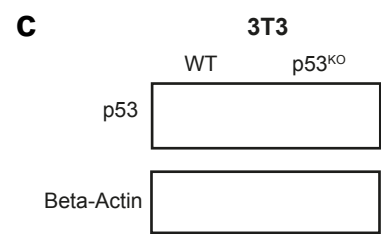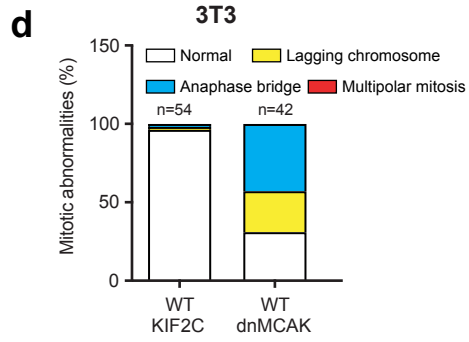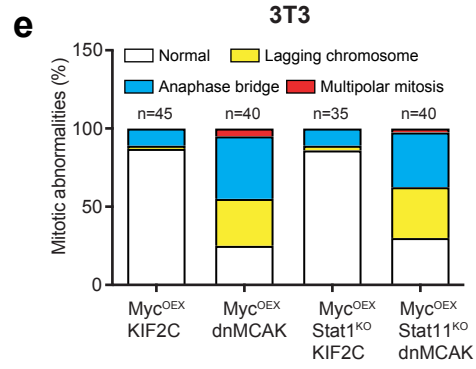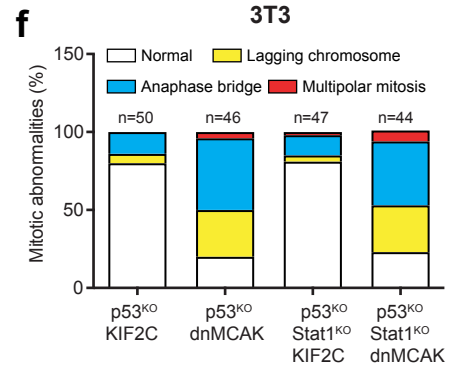

**Schubert et al, Figure S4**
